# Supplementary material for: The outcome of boosting mitochondrial activity in alcohol-associated liver disease is organ-dependent
Source: PubMed Central journal article supplement — Hepatology. 2023 Feb 9;78(3):878–95. doi: 10.1097/HEP.0000000000000303 (PMC10442112; doi:10.1097/hep.0000000000000303), 2023-02-09

**a**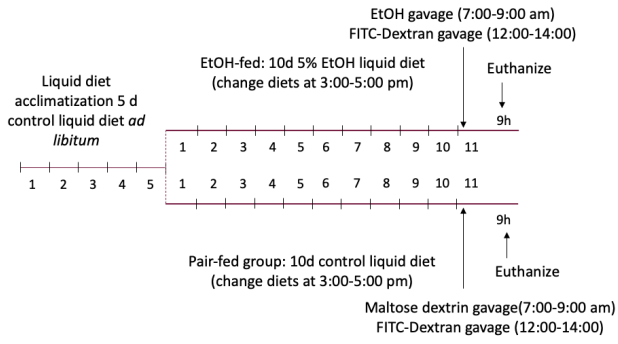**b**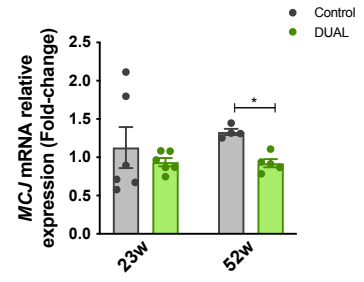

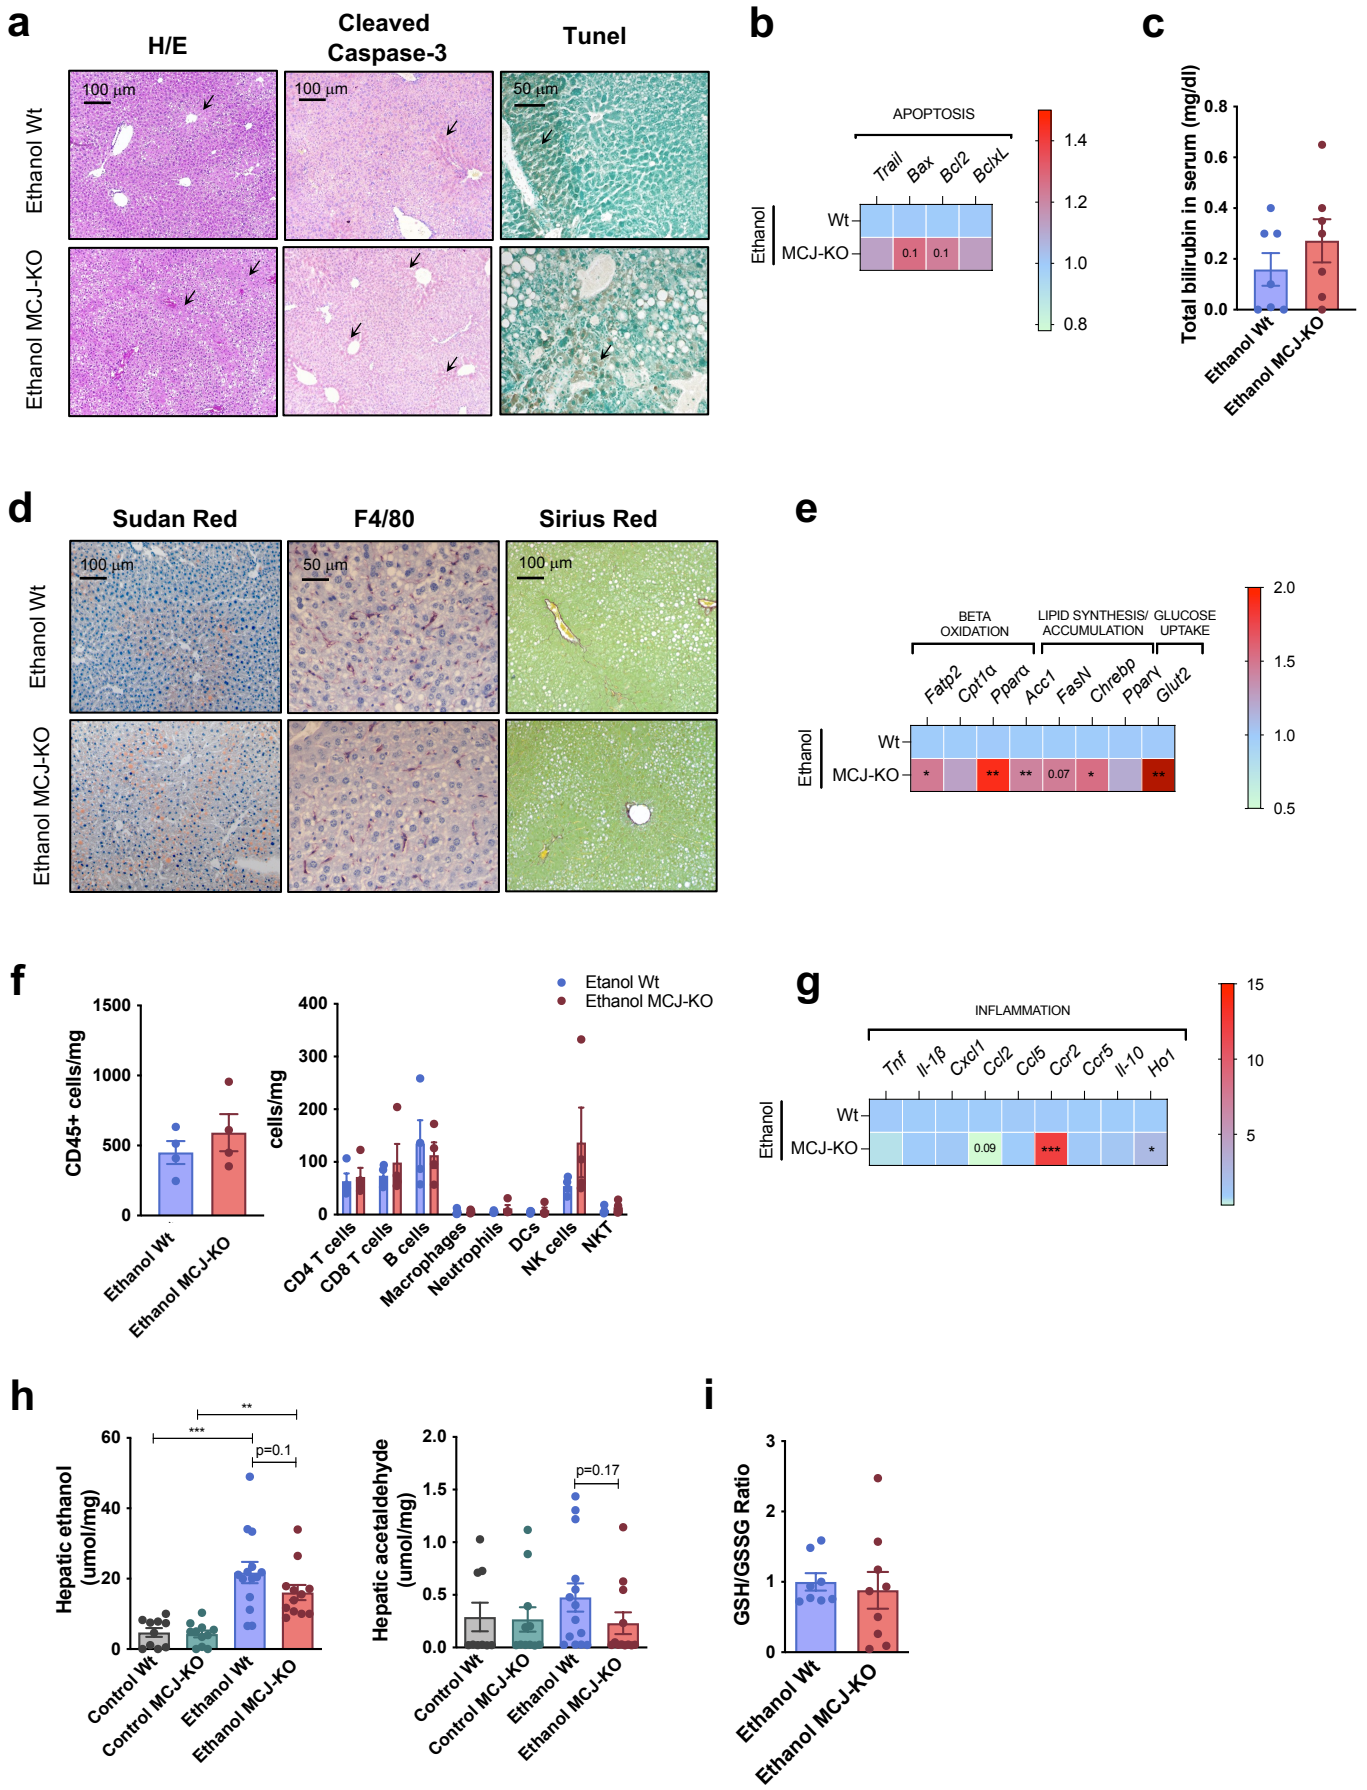

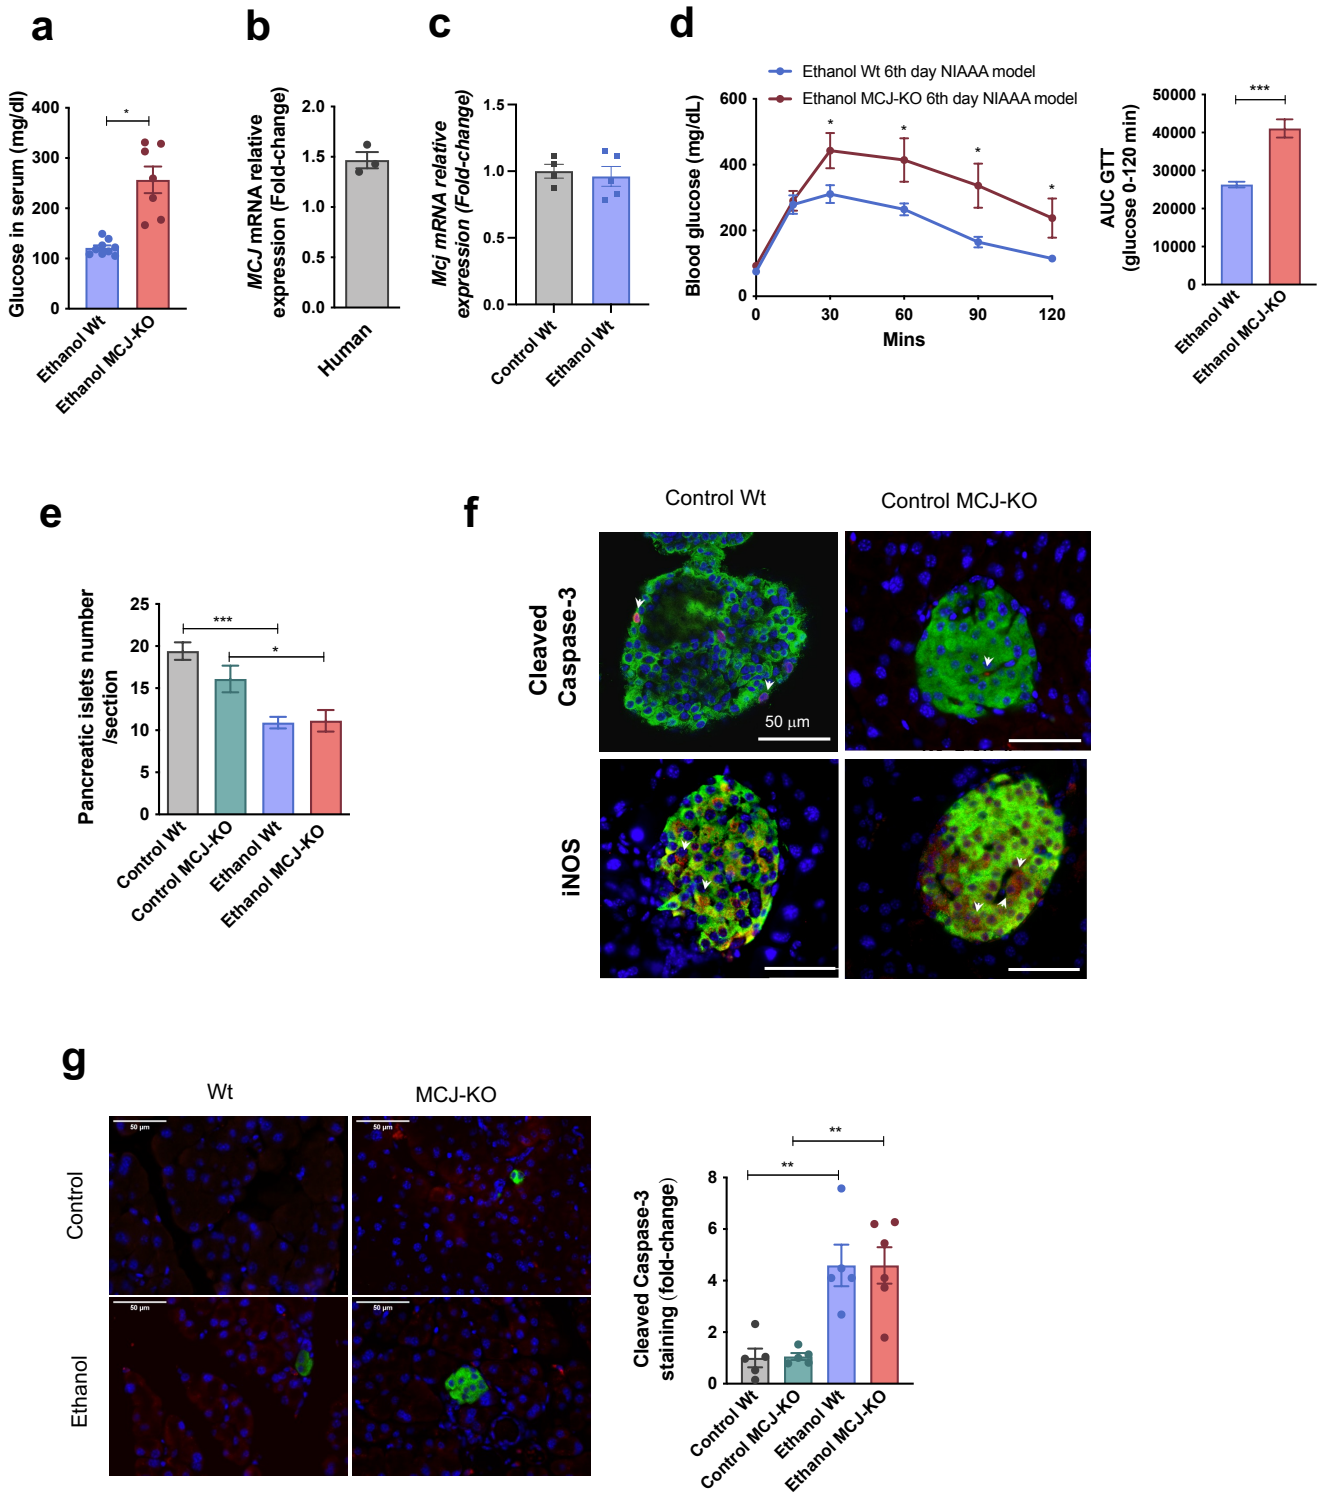

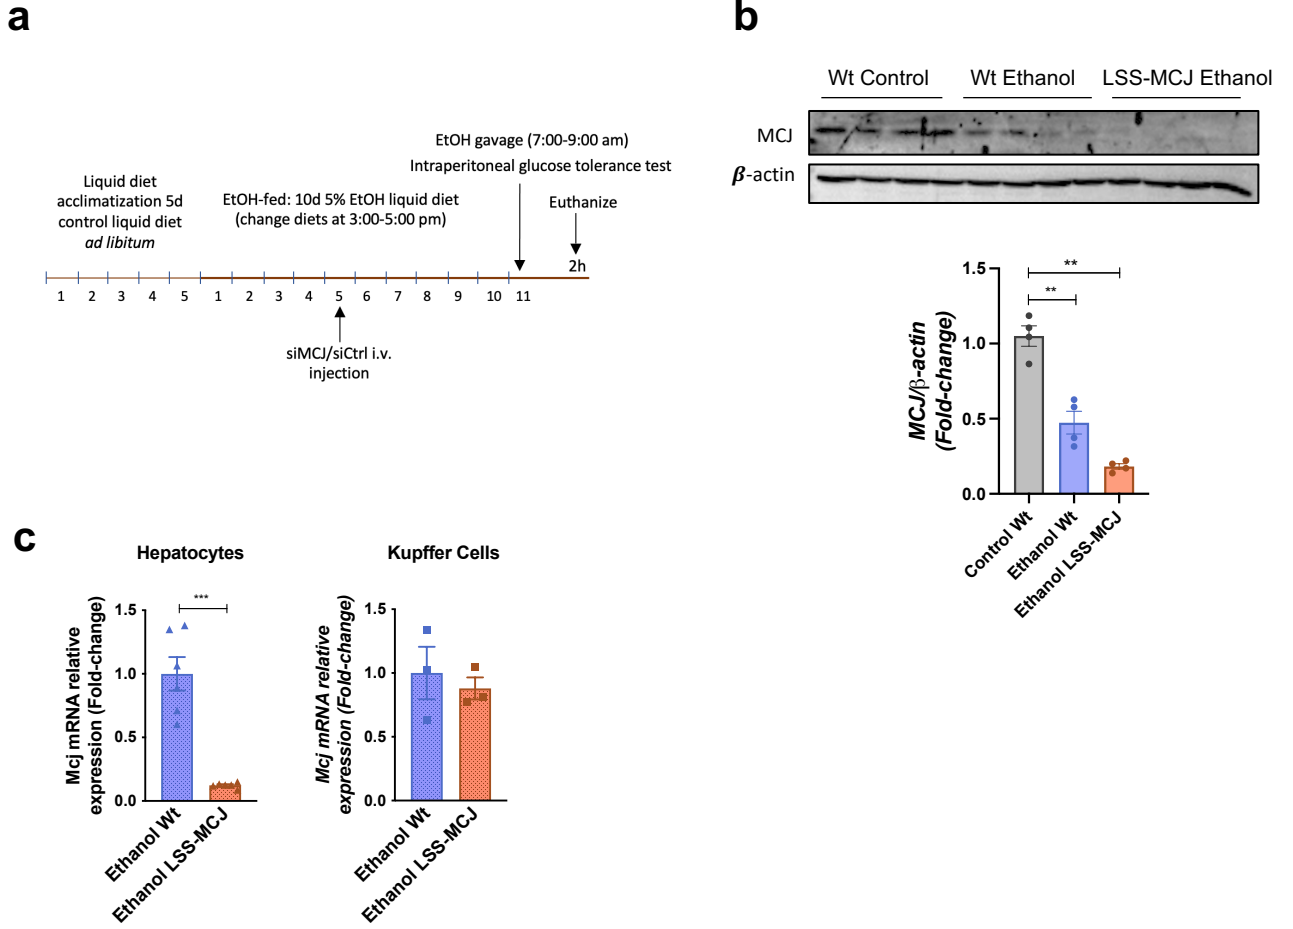

**Supplemental Figure 4**  
(Goikoetxea-Usandizaga and Bravo *et al*)

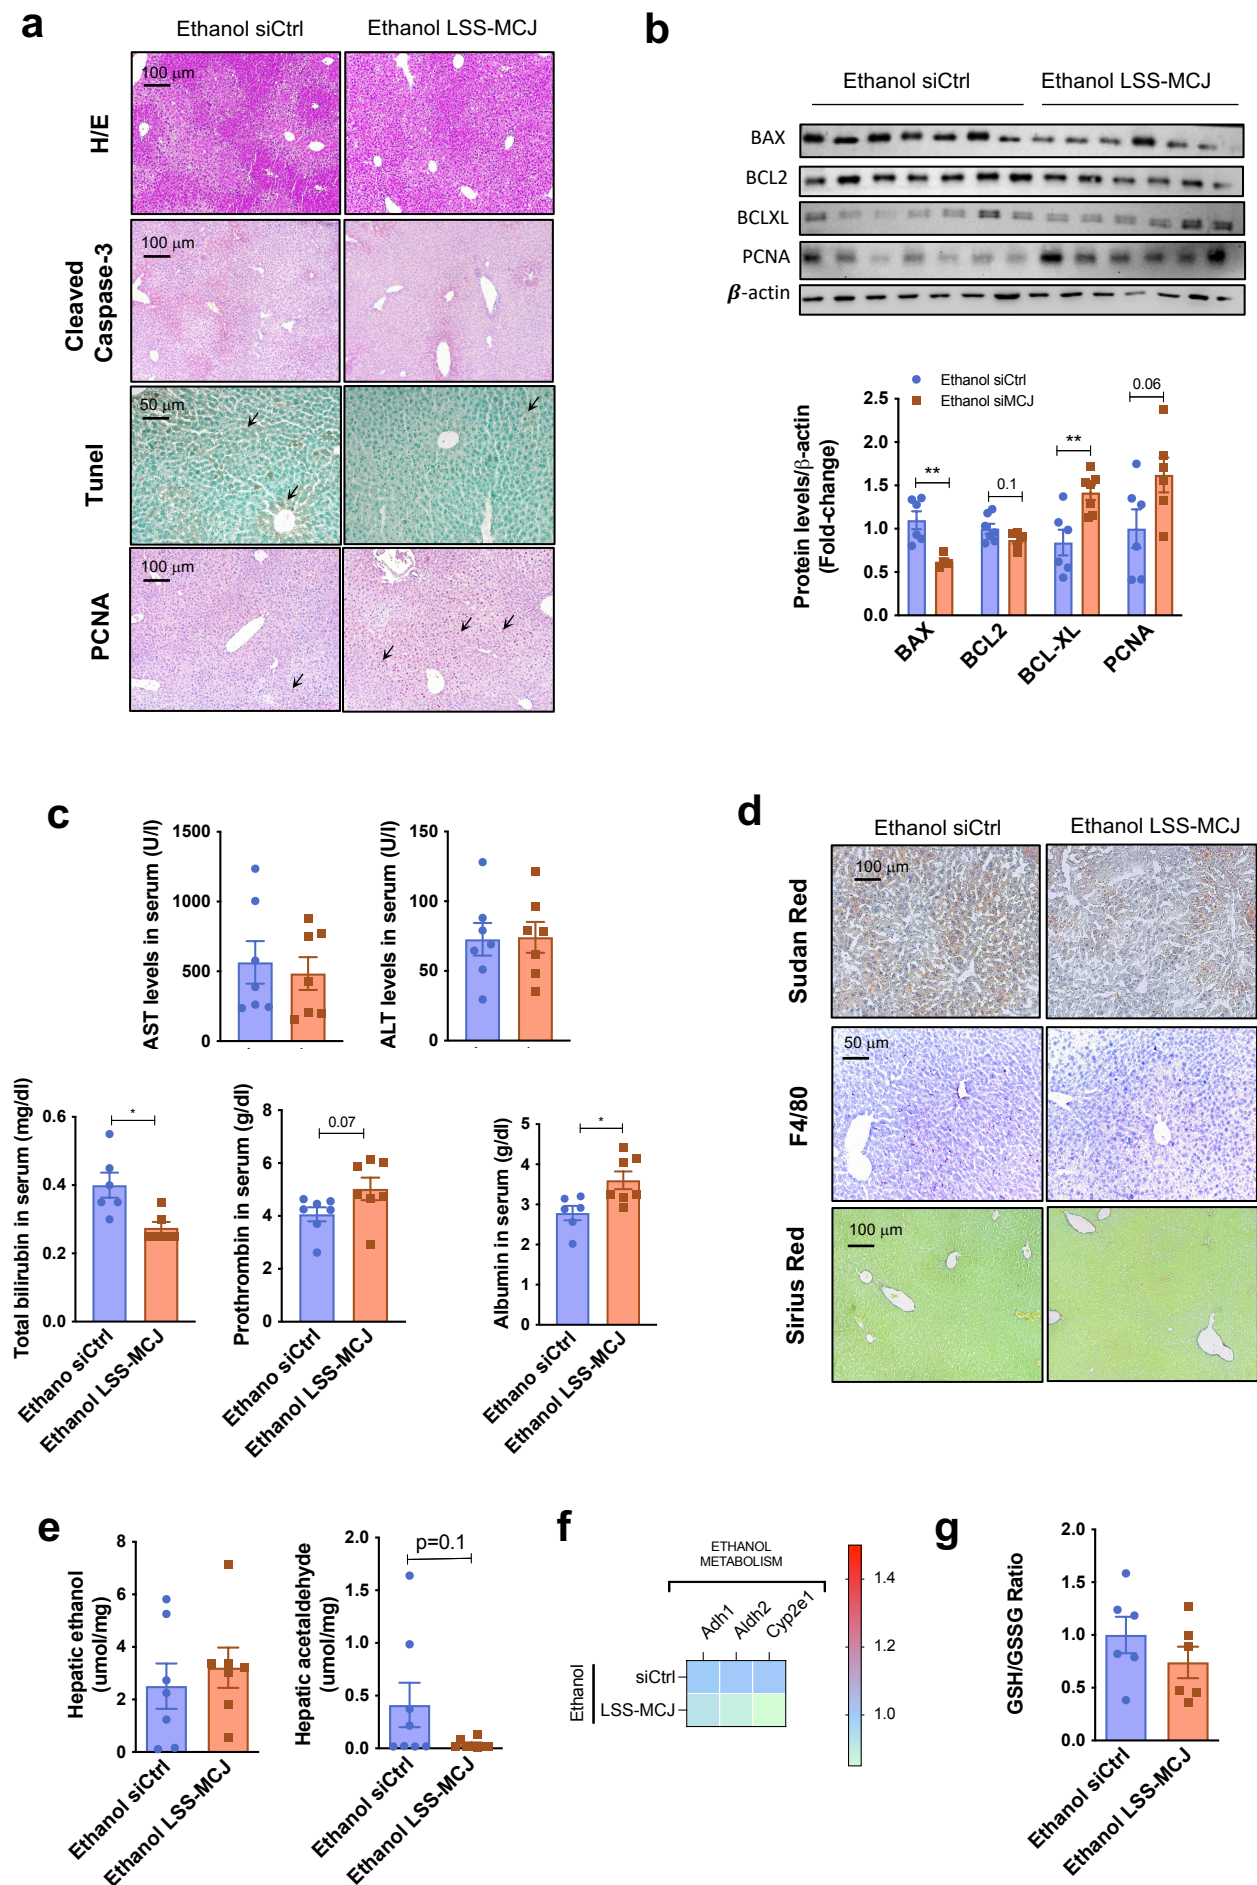

**Supplemental Figure 5**  
(Goikoetxea-Usandizaga and Bravo *et al*)

**a**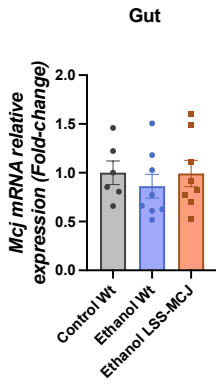**b**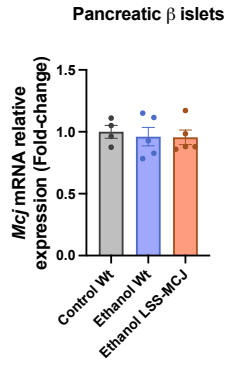

Supplement: hep-78-878-s001.pdf [file hep-78-878-s001.pdf]
